1 **Rational engineering of a  $\beta$ -glucosidase (H0HC94) from glycosyl family I (GH1) to**  
2 **improve catalytic performance on cellobiose**

3  
4  
5 *Sauratej Sengupta<sup>a,#</sup>, Pinaki Chanda<sup>a,#</sup>, Bharat Manna<sup>a,#</sup> and Supratim Datta<sup>\*, a,b,c</sup>*

6 <sup>a</sup> Protein Engineering Laboratory, Department of Biological Sciences, Indian Institute of Science  
7 Education and Research Kolkata, Mohanpur, West Bengal

8 <sup>b</sup>Center for the Advanced Functional Materials, Indian Institute of Science Education and Research  
9 Kolkata, Mohanpur, West Bengal

10 <sup>c</sup>Center for the Climate and Environmental Sciences, Indian Institute of Science Education and Research  
11 Kolkata, Mohanpur, West Bengal

12  
13 <sup>#</sup>Equal contribution

14 <sup>\*</sup>Corresponding author: Supratim Datta, Department of Biological Sciences, Indian Institute of Science  
15 Education and Research Kolkata Mohanpur 741246, West Bengal, India.; email:  
16 [supratim@iiserkol.ac.in](mailto:supratim@iiserkol.ac.in)

35 **Abstract**

36 The conversion of lignocellulosic feedstocks by cellulases to glucose is a critical step in biofuel  
37 production.  $\beta$ -glucosidases catalyze the final step in cellulose breakdown, producing glucose,  
38 and is often the rate-limiting step in biomass hydrolysis. Rationally engineering previously  
39 characterized enzymes may be one strategy to increase catalytic activity and the efficiency of  
40 cellulose hydrolysis. The specific activity of most natural and engineered  $\beta$ -glucosidase is  
41 higher on the artificial substrate p-Nitrophenyl  $\beta$ -D-glucopyranoside (*p*NPGlc) than on the  
42 natural substrate, cellobiose. Based on our hypothesis of increasing catalytic activity by  
43 reducing the interaction of residues present near the active site tunnel entrance with glucose  
44 without disturbing any existing interactions with cellobiose, we report an engineered  $\beta$ -  
45 glucosidase (Q319A H0HC94) with a 1.8-fold specific activity increase ( $366.3 \pm 36$   
46  $\mu\text{mol}/\text{min}/\text{mg}$ ), an almost 1.5-fold increase in  $k_{cat}$  ( $340.8 \pm 27 \text{ s}^{-1}$ ), and a 3-fold increase in  
47 Q319A H0HC94 cellobiose specificity ( $236.65 \text{ mM}^{-1} \text{ s}^{-1}$ ) over HOHC94. Molecular dynamic  
48 simulations and protein structure network analysis indicate that Q319A significantly increased  
49 the dynamically stable communities and hub residues, leading to a change in enzyme  
50 conformation and higher enzymatic activity. This study shows the impact of rational  
51 engineering of non-conserved residue to increase  $\beta$ -glucosidase substrate accessibility and  
52 enzyme specificity.

53

54

55 **Keywords:** protein engineering; cellobiose; specific activity; enzyme specificity; molecular  
56 dynamics simulation; protein structure network;

57

58

## 59 **Introduction**

60 Production of biofuels from glucose produced through the saccharification of lignocellulosic  
61 biomass is a green alternative to fossil fuels pumped out of the earth. Cellulose is a major  
62 component of the naturally abundant lignocellulosic biomass and a homopolymer of glucose.  
63 Cellulases hydrolyze the cellulose to produce glucose. The cellulase cocktail is made up of at  
64 least three hydrolytic enzymes, namely, endoglucanase (EG), cellobiohydrolase (CBH), and  $\beta$ -  
65 glucosidase (BG). EG cleaves the  $\beta$ -1,4-glycosidic linkage of cellulose polymers to generate  
66 short-chain oligosaccharides, which CBH hydrolyzes to produce cellobiose units. Finally,  
67 BG's cleave the  $\beta$ -1,4-glycosidic bonds to generate glucose that microbes can ferment to make  
68 biofuels.<sup>1-3</sup> Most  $\beta$ -glucosidases that are reported in the literature are characterized by the  
69 model chromogenic substrate, *p*-Nitrophenyl beta-D-glucopyranoside (*p*NPGlc). Previously  
70 several attempts have been made to increase the activity of  $\beta$ -glucosidases.<sup>4-7</sup> In most studies,  
71 the activity of engineered  $\beta$ -glucosidases increased more on the artificial substrate *p*NPGlc than  
72 the natural substrate, cellobiose.<sup>4, 5, 8, 9</sup> The objectives of most such studies were to improve  
73 glucose tolerance,<sup>6, 7, 10-12</sup> and thermal/pH stability.<sup>4, 10</sup> Though a few studies reported an  
74 increase in cellobiose activity, there is a general lack of targeted engineering approach reports  
75 to improve cellobiose activity.<sup>7, 9, 12</sup>

76 Previously we reported a wild-type  $\beta$ -glucosidase (H0HC94) from *Agrobacterium*  
77 *tumefaciens* strain 5A belonging to the glycoside hydrolase family I, with high enzymatic  
78 activity on the chromogenic  $\beta$ -glycosidic substrate *p*NPGlc, and moderate activity on its natural  
79 substrate, cellobiose (Clb).<sup>8, 13</sup> Furthermore, the enzyme is stabilized by increasing glucose  
80 concentrations resulting in improved half-life and more tolerance to [C2mim]-based ionic  
81 liquids.<sup>13</sup> These promising properties motivated us to probe the enzyme further to enhance  
82 cellobiose activity and specificity.

83 In this study, we hypothesized that reducing the binding interaction of glucose  
84 molecules to the regions in or around the active site tunnel might enable greater accessibility  
85 of cellobiose, leading to higher cellobiose activity. We have used an *in-silico* rational approach  
86 to determine the target for mutation. Choosing the residue to mutate for engineering a better  $\beta$ -  
87 glucosidase is challenging because both substrate and inhibitor interact with a few common  
88 residues and modulate substrate binding and catalytic activity. Autodock Vina was used to dock  
89 cellobiose (substrate) and glucose (inhibitor) separately to the active site tunnel region.<sup>14</sup> We  
90 identified the non-conserved Q319 at the junction of a  $\beta$ -sheet and a loop near the active site  
91 tunnel entrance and mutated it to an Alanine. Here we report the results of our characterization  
92 of the Q319A mutant, particularly its enhanced cellobiose activity and specificity, along with  
93 molecular dynamics simulations and protein structure network analysis to understand the role  
94 of Q319A on cellobiose activity.

95

## 96 **Materials and Methods**

97 **Chemicals:** Bacterial host strains and plasmids were purchased from Merck Millipore  
98 (Billerica, USA). Reagent-grade chemicals were used in this study. Primers were synthesized  
99 by Eurofins (Bangalore, India). Chromatography columns were acquired from GE Healthcare,  
100 Marlborough, USA. 30 kDa cut-off Amicon-Ultra-15 protein concentrators were bought from  
101 EMD Millipore (Billerica, USA). The culture media and cellobiose were purchased from  
102 Sigma-Aldrich (St. Louis, USA). *p*NPGlc was acquired from TCI Chemicals (Fukaya, Japan).  
103 All plastic consumables were purchased from Tarsons (Kolkata, India).

104

105 **Bacterial host, vectors, and media:** pET-21b(+) (Novagen, Madison, USA) vector was used  
106 for cloning and expression of the mutant. *Escherichia coli* Top10F strain cells were used as the  
107 cloning host and *E. coli* BL21(DE3) (Stratagene Cloning Systems, La Jolla, CA) as the

108 expression host. T7 RNA polymerase promoter was used for the overexpression of mutant  
109 protein by IPTG (G-Biosciences, St. Louis, USA) induction. All cells were screened and grown  
110 in Luria-Bertani agar/broth media bought from Sigma-Aldrich (St. Louis, USA).

111

112 **Molecular docking of cellobiose to H0HC94:** Autodock Vina was used for the molecular  
113 docking of cellobiose and glucose to the active site tunnel of the protein (PDB: 6RJO).<sup>14, 15</sup> In  
114 the configuration file, the dimension of the grid box used for docking was 40×40×40 covering  
115 the active site tunnel with a spacing of 1Å. Energy range and exhaustiveness parameter values  
116 were 4 and 8, respectively. Discovery studio generated 2D interaction diagrams of the wild-  
117 type protein with ligands such as cellobiose and glucose.<sup>16</sup> A detailed 2D interaction diagram  
118 was generated by the PoseView tool in ProteinsPlus Server (proteins.plus/).<sup>17</sup> An in-house  
119 python script was used to analyze the different poses generated by molecular docking and  
120 identify residues that most frequently interacted with glucose molecules. A histogram showing  
121 how often a residue interacted with glucose in various poses was generated with the data.

122

123 **Primer design, and PCR:** The Q319A mutant was generated using the megaprimer-based  
124 PCR mutagenesis,<sup>18</sup> using vector-specific T7 forward and T7 reverse primers along with the  
125 mutagenic primer. The mutagenic primer sequence containing flanking restriction sites, *XhoI*  
126 and *HindIII*, is 5'CCCTGCCACCAAAGCGGCCCCGGCCGTCAGC 3'. A 1 % Agarose gel  
127 was used to resolve and visualize the amplified gene product, and the amplified products were  
128 by QIAquick gel extraction kit (Qiagen, New Delhi, India).

129

130 **Cloning:** The purified mutant gene was digested with *XhoI* and *HindIII* in CutSmart buffer  
131 (New England Biolabs, Ipswich, MA, USA). The digested gene product was ligated to the pre-  
132 digested and phosphatase-treated pET21b (+) plasmid by T4 ligase (New England Biolabs,

133 Ipswich, MA, USA). Top10F *Escherichia coli* cells were transformed with ligated product  
134 using the heat shock method and used as the cloning host. The mutation was confirmed by  
135 Sanger sequencing at the DBS, IISER Kolkata sequencing facility.

136

137 **Expression and Protein Purification:** Q319A H0HC94 was expressed and purified as  
138 described in our earlier study.<sup>13</sup> The protein purity was confirmed by 10 % SDS-PAGE.

139

140 **Differential Scanning Fluorimetry (DSF):** Q319A H0HC94 DSF was performed, and the  
141 data were analyzed according to the previously reported protocol.<sup>13</sup>

142

143 **Circular Dichroism (CD):** The spectra were measured on a JASCO J-1500 Circular  
144 Dichroism Spectrophotometer (Easton, MA, USA) using a 1 mm cuvette. The scanning speed  
145 and bandwidth were 100 nm/min and 1 nm, respectively. The CD analysis was performed at  
146 room temperature (25 °C) with 1.9 µM wild-type and Q319A mutant in 50 mM potassium  
147 phosphate buffer, pH 7.4.

148

149 **Biochemical Characterization and Half-life Determination:** The optimum temperature  
150 ( $T_{opt}$ ) and optimum pH ( $pH_{opt}$ ) of the mutant were ascertained by comparing the relative activity  
151 of the mutant between pH 4-10 (at 49 °C) and at 37 to 55 °C (at pH 7) respectively. 100 µL  
152 reactions were performed in 50 mM potassium phosphate buffer, using 0.05 µg enzyme, 20  
153 mM *p*-nitrophenyl beta-D-glucopyranoside (*p*NPGlc) as the substrate, for a total reaction time  
154 of 30 min. The temperature and pH at which the mutant had the highest relative specific activity  
155 were chosen as the optimum reaction parameters for further kinetic analysis.

156 For half-life measurement, the protein was incubated in 50 mM potassium phosphate  
157 buffer, pH 7.0 at 49 °C up to 90 min. At regular intervals, reaction aliquots were taken out to

158 determine enzyme specific activity. The relative specific activity was used to ascertain the half-  
159 life of the mutant protein using GraphPad Prism 9 software (GraphPad Software, La Jolla, CA)  
160 by fitting the data to a one-phase decay function. All experiments were performed in triplicates  
161 and repeated at least twice. The standard deviations among the repeats were below 10 %.

162

163 **Kinetic Parameters:** Michaelis-Menten kinetics were performed on *p*NPGlc and cellobiose,  
164 with 0.5 mM to 40 mM substrate in 50 mM potassium phosphate buffer, pH 7, at 49 °C. In a  
165 100 µL reaction volume, 0.16 µg of protein was used, and the reaction was quenched after 5  
166 min. The buffer and the substrate were pre-incubated at 49 °C for 5 min before each reaction.  
167 For the *p*NPGlc assay, the reaction was stopped using 100 µL 0.4 M glycine (pH 10.8), and the  
168 reaction mixture was 20-fold diluted before taking an absorbance measurement at 405 nm in a  
169 clear bottom 96-well plate (Tarsons, Kolkata, India). The absorbance was measured by a  
170 Spectramax M2 spectrophotometer (Molecular Devices, San Jose, CA, USA). The experiment  
171 was done in triplicates and repeated thrice. The standard deviations among the repeats were  
172 below 10 %.

173 For the cellobiose reaction, the reaction was stopped by heat inactivation at 95 °C for  
174 15 min. The reaction product was 8 -fold diluted in 50 mM potassium phosphate buffer, pH  
175 7.0, before performing the GOD-POD assay (Sigma, St Louis, USA). The absorbance of the  
176 final product mixture was recorded at 527 nm as described for the reaction on *p*NPGlc.  
177 GraphPad Prism 9 software (GraphPad Software, La Jolla, CA) was used to analyze the  
178 velocity data and calculate the kinetic constants such as  $K_m$  and  $k_{cat}$ . The experiment was done  
179 in duplicate and repeated twice with different batches of purified protein. The standard  
180 deviations among the repeats were below 10 %.

181

182

183 **Molecular dynamics (MD) simulation:** MD simulations were performed using the X-ray  
184 crystal structure (PDB ID: 6RJO) of  $\beta$ -glucosidase from *A. tumefaciens* 5A.<sup>15</sup> AMBER20<sup>19</sup> was  
185 utilized to carry out the simulations. The residue numbering of the enzyme is as per previous  
186 reports<sup>20, 21</sup>. The AMBERff14SB<sup>22</sup> force field was employed for the protein, whereas the  
187 GLYCAM06<sup>23</sup> and General Amber Force Field (GAFF) were assigned to cellobiose and  
188 *p*NPGlc molecules, respectively. The Q319A mutant was prepared from the WT by using  
189 Chimera.<sup>24</sup> Four systems were prepared for the MD simulations: S1: WT+0.02 M *p*NPGlc, S2:  
190 WT+0.02 M Cellobiose, S3: Q319A+0.02 M *p*NPGlc, S4: Q319A+0.02 M Cellobiose  
191 (Supplementary Table S1). The simulation systems were built using PACKMOL.<sup>25</sup> The  
192 enzymes were protonated at their respective  $pH_{opt}$  using the PDB2PQR<sup>26</sup> server  
193 (Supplementary Table S1). The TIP3P water model's parameters were adopted for the water  
194 molecules<sup>27</sup>. The bulk system's characteristics were simulated using periodic boundary  
195 conditions (PBC). The particle mesh Ewald (PME) summation method was used to calculate  
196 the electrostatic interaction with the distance threshold for nonbonded interactions of 10 Å.<sup>28</sup>  
197 With the Langevin thermostat, the temperature was kept at the corresponding  $T_{opt}$  of the  
198 enzyme (Supplementary Table S1). The SHAKE method was used to constrain Hydrogen atom  
199 containing bonds. Using the steepest descent algorithm, the starting geometries of all systems  
200 were energy minimized for 10,000 steps. With a time-step of 2 femtosecond (fs), the MD  
201 production run was carried out for 200 ns under the NPT ensemble. The CPPTRAJ<sup>29</sup> module  
202 was used to evaluate the trajectory data, which was saved with a 1 picosecond (ps) interval.  
203 The simulation results were displayed using Visual molecular dynamics (VMD).<sup>30</sup>

204

205 **Protein Structural Network (PSN) analysis:** A dynamic protein structure network (PSN) was  
206 constructed to examine protein structures generated from simulation trajectories. The protein  
207 structures from each frame of the simulation were utilized to build the PSN, where the amino



208 acid residues served as nodes, and edges were formed between two nodes involved in non-  
209 covalent interactions. To determine the strength of the edges, the percentage interaction ( $I_{ij}$ )

210 between residues  $i$  and  $j$  is: 
$$I_{ij} = \frac{n_{ij}}{\sqrt{N_i \times N_j}} \times 100 \quad (1)$$

211 where  $n_{ij}$  is the number of atom pairs between residues  $i$  and  $j$  within 4.5 Å.<sup>20</sup> The normalization  
212 factors  $N_i$  and  $N_j$  are unique to the types of residues  $i$  and  $j$ , respectively. A community is a  
213 union of cliques (complete connected subgraph) that share common nodes.<sup>20, 31</sup> The nodes with  
214 at least four edges were attributed as hub residues.<sup>32</sup> All the PSN analyses were performed  
215 using PSN Tools.<sup>33</sup>

216

## 217 **Results and Discussion**

218 **Selection of mutation site (Q319):** Molecular docking results indicate that residues such as  
219 Q25, H126, N170, Y299, W405, and E359 (catalytic residue), interact with cellobiose  
220 (Supplementary Figure S1a). Similar interactions were also reported in the crystal structure  
221 (PDB ID: 6RJO), where the ligand was salicin (a substrate analog).<sup>15</sup> Mutating such residues  
222 might disrupt the substrate-enzyme interactions and affect biocatalysis. Therefore our goal was  
223 to introduce a mutation that would disrupt interactions between active site tunnel residues and  
224 glucose without affecting any interactions with cellobiose. Glucose interacts with the backbone  
225 of amino acid residues (instead of the side chain) such as T300, G331, and P301, so mutating  
226 these residues might not affect the glucose binding. Other residues like W127, W173, C174,  
227 L178, H185, H229, S230, N227, N297, Y298, M302, R303, Q319, A322, K327, W332, E333,  
228 E359, E412, W413, F421 interacts with glucose through its side-chain by forming hydrogen  
229 bonds and/or van der Waal interactions (Supplementary Figure S1b). We preferred to disrupt  
230 the stronger bonding interactions over van der Waal interactions. Q25, E171, C174, N227,  
231 H229, T300, P301, R303, Q319, K327, G331, E333, E359, W405, E412, and W41 formed  
232 hydrogen bonds with glucose. Of these, Q25, E171, T300, Q319, K327, and W405 appeared

233 at least twice while searching through the different poses of glucose binding generated by  
234 molecular docking (Supplementary Figure S1). Q319 appeared in two poses to form hydrogen  
235 bonds with glucose, does not interact with cellobiose (Supplementary Figure S2), and is a non-  
236 conserved residue, so we selected Q319 to study its effect on glucose binding and catalysis.

237

238 **Engineering of Q319A H0HC94:** We performed site-directed mutagenesis on the wild-type  
239 gene to produce the Q319A HOHC94. To compare its properties with the wild-type (WT), we  
240 overexpressed the enzyme in *E. coli* and purified it (Supplementary Figure S3a, S3b). SDS  
241 PAGE of the purified mutant protein showed a clear, prominent band at approximately 52 kDa  
242 (Supplementary Figure S3c). The optimum temperature ( $T_{opt}$ ) and optimum pH ( $pH_{opt}$ ) of the  
243 Q319A mutant were 49 °C (Figure 1a) and 7.0 (Figure 1b), respectively, compared to 52 °C  
244 and 7.2, respectively, of the WT.<sup>13</sup> Thus, while the  $pH_{opt}$  was almost unchanged, the  $T_{opt}$   
245 decreased by 3 °C.

246

247 **Thermal stability of the mutant:** An enzyme's structural and thermal stability often plays a  
248 crucial role in its catalytic activity. Differential Scanning Fluorimetry (DSF) analysis was used  
249 to measure melting temperature ( $T_m$ ) to understand the effect of mutation on enzyme stability.  
250 The  $T_m$  of the Q319A mutant was 53.9 °C (Figure 2c), similar to H0HC94  $T_m$  of 53.7 °C.<sup>13</sup> To  
251 verify the absence of any overall structural distortion due to the mutation, we measured the  
252 circular dichroism (CD) spectra at room temperature and observed no significant difference  
253 between the secondary structure of wild-type H0HC94 and Q319A (Figure 2b, Supplementary  
254 Table S2).

255 The half-life of Q319A H0HC94 increased by 1.4-fold compared to the wild-type. The  
256 half-life of Q319A was  $22 \pm 1$  min (Figure 2a) compared to 16 min of the wild-type<sup>13</sup>. This  
257 increase suggests a slight enhancement in Q319A thermal stability.

258

259 **The catalytic efficiency of Q319A compared to the WT:** Specific activity on *p*NPGlc  
260 increased 1.2-fold from 248  $\mu\text{mol}/\text{min}/\text{mg}$  of the WT to  $291 \pm 4 \mu\text{mol min}^{-1} \text{mg}^{-1}$  for the Q319A  
261 mutant (Figure 1h). The analysis of kinetic velocity data using *p*NPGlc as substrate (Figure 1c)  
262 shows that Q319A has a lower  $K_m$  of  $2.1 \pm 0.1 \text{ mM}$  compared to  $3.09 \pm 0.4 \text{ mM}$  of the WT  
263 (Figure 1e).<sup>13</sup> The lower  $K_m$  probably reflects an increased affinity of the substrate due to its  
264 enhanced accessibility to the substrate binding site. The turnover number,  $k_{\text{cat}}$ , on *p*NPGlc, at  
265  $276.6 \pm 2.3 \text{ s}^{-1}$ , almost remained the same as the wild-type ( $277.9 \pm 4 \text{ s}^{-1}$ , Figure 1f).

266 Michaelis Menten kinetic assays of Q319A H0HC94 were also performed on its natural  
267 substrate, cellobiose (Figure 1d). The specific activity on cellobiose increased 1.8-fold from  
268  $204 \pm 12 \mu\text{mol}/\text{min}/\text{mg}$  to  $366.3 \pm 36 \mu\text{mol}/\text{min}/\text{mg}$  (Figure 1h). The  $K_m$  decreased from 2.94  
269 mM to  $1.44 \pm 0.3 \text{ mM}$  (Figure 1e), while the  $k_{\text{cat}}$  increased approximately 1.5-fold from  $233.4$   
270  $\pm 6 \text{ s}^{-1}$  to  $340.8 \pm 27 \text{ s}^{-1}$  (Figure 1f). Thus, the substrate specificity of Q319A increased 3-fold  
271 to  $236.65 \text{ mM}^{-1} \text{ s}^{-1}$  from  $79.32 \text{ mM}^{-1} \text{ s}^{-1}$  of the WT (Figure 1g). To make sense of the increase,  
272 we compared previous reports of engineered GH1  $\beta$ -glucosidase in the literature (Table 1). A  
273  $\beta$ -glucosidase, BglA, from *Caldicellulosiruptor saccharolyticus* (CsBglA) was engineered to  
274 improve catalysis at a lower temperature.<sup>9</sup> By random mutagenesis, the  $k_{\text{cat}}/K_m$  of a triple  
275 mutant variant of a glucose tolerant Bgl6 was improved 3-fold, from  $0.56 \text{ mM}^{-1} \text{ min}^{-1}$  to  $1.69$   
276  $\text{mM}^{-1} \text{ min}^{-1}$ .<sup>11</sup> Recently, in another study, the authors engineered a glucose tolerant variant of  
277 Bgl15 and enhanced cellobiose specificity from  $0.10 \pm 0.01$  to  $1.20 \pm 0.09 \text{ mM}^{-1} \text{ sec}^{-1}$ .<sup>12</sup> While  
278 the cellobiose specificity reported in this work is higher than previously reported, current  
279 efforts are on to further improve substrate specificity similar to that of Ks5A7 (Table 1).

280

281 **Molecular dynamic insights into the structural stability of Q319A H0HC94:** H0HC94  
282 contains  $(\beta/\alpha)_8$ -barrel structural fold and belongs to the GH1 family (Supplementary Figure

283 S4).<sup>15</sup> The dynamic properties of WT H0HC94 and the Q319A variant were assessed by  
284 performing all-atom molecular dynamics simulations in the presence of the chromogenic  
285 substrate *p*NPGlc and natural substrate, cellobiose (Supplementary Table S1). Root-Mean-  
286 Square Deviation (rmsd) was calculated based on the backbone C<sub>α</sub> atoms. The initial structure  
287 was considered as a reference. The average rmsd values were  $1.54 \pm 0.22 \text{ \AA}$ ,  $1.24 \pm 0.13 \text{ \AA}$ ,  
288  $1.17 \pm 0.11 \text{ \AA}$ ,  $1.18 \pm 0.11 \text{ \AA}$  in S1 (WT + 0.02 M *p*NPGlc), S2 (WT + 0.02 M Cellobiose), S3  
289 (Q319A +0.02 M *p*NPGlc) and S4 (Q319A +0.02 M Cellobiose), respectively (Figure 3a). Low  
290 average rmsd values indicated that neither WT nor Q319A deviated from their starting  
291 structures, and the Q319A mutation did not cause any significant alteration to the H0HC94  
292 structure at the backbone level during the simulation timescale. A similar rmsd pattern was  
293 previously reported, signifying the overall structural stability of the enzyme under the studied  
294 timescales.<sup>20, 21</sup>

295 To understand the role of amino acid residues, the residue flexibility was measured by  
296 the Root-Mean-Square fluctuation (rmsf) profiles during the simulations (Figure 3b). The  
297 active site catalytic residues, active site tunnel residues, and gatekeeper residues exhibited low  
298 average rmsf ( $\leq 1.0734 \text{ \AA}$ ) across the H0HC94 variants indicating no significant changes due  
299 to the Q319 mutation (Supplementary Table S3). However, there were slight fluctuations  
300 between the WT and Q319A in the presence of substrates. For example, due to Q319A  
301 mutation, residues E171, H126, W127, N170, C174, W331, W405, W413, L178, and H185  
302 had slightly reduced flexibility, whereas the flexibility of E359, N297, N227, H229, Y299, and  
303 T300 slightly increased in the presence of *p*NPGlc (S3) compared to WT (S1). However, there  
304 were more residues with higher flexibilities (E171, E359, W127, N170, C174, N297, W413,  
305 L178, H185, Y299, and T300) and few with reduced fluctuations (H126, W331, W405, N227,  
306 and H229) in the presence of cellobiose compared to WT (S3). This differential local residue

307 flexibility within the active site micro-environment suggests an alteration in enzyme-substrate  
308 interaction between the chromogenic substrate (*p*NPGlc) and natural substrate (cellobiose).

309

310 **Interaction between enzyme and substrate by Hydrogen bond analysis:** During the  
311 simulation process, the interactions of both substrates with WT and Q319A were investigated  
312 to look for non-bonding driving forces like enzyme-substrate inter-hydrogen bonds. We  
313 previously reported that glucose might form multiple hydrogen bonds to H0HC94 through  
314 hydroxyl groups.<sup>20, 21</sup> Our current simulations show that the average number of inter-hydrogen  
315 bonds between H0HC94 and substrates were  $10 \pm 3$ ,  $20 \pm 4$ ,  $9 \pm 3$ , and  $15 \pm 3$  in S1, S2, S3,  
316 and S4, respectively (Supplementary Table S1; Figure 4a). Cellobiose formed comparatively  
317 more hydrogen bonds with both WT and mutant than *p*NPGlc. Interestingly, there was a slight  
318 decrease in the average number of hydrogen bonds in Q319A (both in *p*NPGlc and cellobiose)  
319 compared to the WT. It suggests that due to Q319A mutation, the interaction between the  
320 enzyme and substrate is slightly altered compared to the WT. To pinpoint the exact residue-  
321 specific interactions that were affected due to the mutation, the hydrogen bond fraction for each  
322 residue was computed in every system. The hydrogen bond fraction refers to the total amount  
323 of time a specific hydrogen bond was present throughout the entire simulation trajectory. There  
324 were 9, 12, 31, and 15 residues with hydrogen bonding fractions greater than 0.1 in S1, S2, S3,  
325 and S4, respectively (Figure 4b). Though the hydrogen bonding fraction was low, there were  
326 notable differences across the systems. For example, four active site tunnel residues (Q25,  
327 N297, E359, and W413) had hydrogen bonding fractions greater than 0.1 in S1, whereas there  
328 were 10 residues (E171, H185, N227, Y299, T300, D329, E359, W405, E412, and E415) inside  
329 the active site tunnel in S3, while enzymes in both the systems were interacting with *p*NPGlc.  
330 It indicates that the Q319A mutation enabled a preferential interaction between the active site  
331 tunnel residues and *p*NPGlc leading to higher *p*NPGlc activity of the mutant. Besides, 9

332 residues (E171, N227, H251, Y299, R303, Q319, E359, W405, E415) around and outside the  
333 active site tunnel were interacting with cellobiose in S2. The number of interacting residues  
334 was similar (Q25, E171, Y182, Y299, T317, E359, E412) in S4. As all the enzymes were  
335 interacting with their corresponding substrates (*p*NPGlc or cellobiose), the hydrogen bonding  
336 fraction with either of the two catalytic residues (E171, E359) was high in both WT and Q319A.  
337 Thus, the hydrogen bonding analyses revealed that the mode of interaction with *p*NPGlc or  
338 cellobiose was different in both WT H0HC94 and Q319A. Also, the Q319A mutation enhanced  
339 the active site tunnel hydrogen-bonding interactions with *p*NPGlc, while on the other hand, the  
340 total number of surface interactions was reduced in the case of the cellobiose. In both scenarios,  
341 the Q319A exhibited higher activity than the WT enzyme, as confirmed by experiments.

342

### 343 **Conformational change of the proteins using Protein Structure Network (PSN) Analysis**

344 In recent years, dynamic changes in the conformation of enzymes from different glycoside  
345 hydrolases (GHs) such as endoglucanase Cel12A,<sup>32</sup> xylanase,<sup>31</sup> and  $\beta$ -Glucosidase<sup>20, 21</sup> was  
346 investigated by PSN to provide global characteristics of protein structures during MD  
347 simulations. We examined the conformational changes of WT and Q319A in the presence of  
348 *p*NPGlc and cellobiose by constructing the PSN on each enzyme structure from the simulation  
349 trajectories and evaluating it using novel network parameters, *i.e.*, dynamically stable network  
350 communities (connected cliques) and hubs (nodes with  $\geq 4$  edges). The communities/hubs are  
351 considered dynamically stable if they were present in more than 50 % of the simulation  
352 trajectories. The PSN analysis revealed considerable differences in the community (C) pattern  
353 of the H0HC94 in S1 (communities=6, nodes=43), S2 (communities=7, nodes=59), S3  
354 (communities=5, nodes=67), and S4 (communities=6, nodes=61) systems (Figure 5, 6). Out of  
355 the 6 communities in S1 (WT+0.02 M *p*NPGlc), the active site community (C1) comprised of  
356 20 residues (Figure 5a, 5b). On the other hand, the active site community (C1) in Q319A (S3),

357 had increased to 54 residues (Figure 6a, 6b). Moreover, the total number of edges was  
358 increased, signifying the elevated interactions within the Q319A (S3) compared to the WT  
359 (S1). Also, the total number of hub residues increased in S3 (16) compared to S1 (12),  
360 indicating higher integrity of the PSN and increased stability of the mutant structure. The  
361 protein in S2 (WT+0.02 M Cellobiose) had the active site community (C1) comprised of 24  
362 residues (Figure 5c, 5d). But, due to the Q319A mutation (S4), the active site community (C1)  
363 had increased to 45 residues (Figure 6c, 6d). Moreover, the total number of edges increased,  
364 signifying the elevated interactions within Q319A (S4) compared to WT (S2). Also, the total  
365 number of hub residues increased in S4 (15) compared to S2 (9), indicating a more compact  
366 PSN and stabilized Q319A structure. The PSN analysis reveals that the active site  
367 conformation was significantly remodeled due to the Q319A mutation. Substrate-induced  
368 conformational changes were different for *p*NPGlc and cellobiose. Thus, the PSN analysis  
369 reveals that both the active site structure and the conformation of Q319A are more stable and  
370 robust, corroborating the increase in experimentally determined activity and specificity over  
371 the WT.

372

### 373 **Conclusion**

374 Based on molecular docking results, we engineered Q319A H0HC94 by disrupting its  
375 interaction with glucose and enhancing cellobiose accessibility. We speculated that disrupting  
376 the enzyme-product (glucose) interaction at the entrance near the outside of the tunnel might  
377 facilitate the substrate (cellobiose or *p*NPGlc) access to the enzyme's active site. The Q319A  
378 H0HC94 showed an enhancement of enzyme activity on cellobiose and increased cellobiose  
379 specificity. This study revealed that mutating a non-conserved residue (Q319) distant from the  
380 active site induced favorable conformational changes, leading to enhanced enzymatic activity.  
381 Our findings pave the way for engineering  $\beta$ -glucosidases without affecting the native active-

382 site topology of the enzyme. This work also demonstrates the advantages of rational  
383 engineering of enzymes.

384

### 385 **Acknowledgement**

386 SS is supported by a Junior Research Fellowship from IISER Kolkata, PC by an  
387 Inspire Fellowship, DST, Govt. of India, and BM by a IISER Kolkata Postdoctoral Fellowship.

388

### 389 **Funding Sources**

390 This work was supported by the Science & Engineering Research Board (SERB), Government  
391 of India, EMR/2016/003705 (SD), IISER Kolkata Academic Research Fund and Inspire,  
392 Department of Science and Technology, Government of India. The authors thank the  
393 infrastructural facilities supported by IISER Kolkata and DST-FIST (SR/FST/LS-  
394 II/2017/93(c)).

395

396

397

398

399

400

401

402

403

404



## 405 References

- 406 1. Goswami, S.; Nath, P.; Datta, S., Chapter 3 - Role of thermophilic cellulases and  
407 organisms in the conversion of biomass to biofuels. In *Extremozymes and Their Industrial*  
408 *Applications*, Arora, N. K.; Agnihotri, S.; Mishra, J., Eds. Academic Press: **2022**; pp 85-113.
- 409 2. Aich, S.; Datta, S., Efficient Utilization of Lignocellulosic Biomass: Hydrolysis  
410 Methods for Biorefineries. In *Biorefineries: A Step Towards Renewable and Clean Energy*,  
411 Verma, P., Ed. Springer Singapore: Singapore, **2020**; pp 273-295.
- 412 3. Datta, S., Recent Strategies to Overexpress and Engineer Cellulases for Biomass  
413 Degradation. *Current Metabolomics* **2016**, *4* (1), 14-22.
- 414 4. Sinha, S. K.; Goswami, S.; Das, S.; Datta, S., Exploiting non-conserved residues to  
415 improve activity and stability of Halothermothrix orenii  $\beta$ -glucosidase. *Appl Microbiol*  
416 *Biotechnol* **2017**, *101* (4), 1455-1463.
- 417 5. Lee, H. L.; Chang, C. K.; Jeng, W. Y.; Wang, A. H.; Liang, P. H., Mutations in the  
418 substrate entrance region of  $\beta$ -glucosidase from Trichoderma reesei improve enzyme activity  
419 and thermostability. *Protein Eng Des Sel* **2012**, *25* (11), 733-40.
- 420 6. Santos, C. A.; Morais, M. A. B.; Terrett, O. M.; Lyczakowski, J. J.; Zanphorlin, L.  
421 M.; Ferreira-Filho, J. A.; Tonoli, C. C. C.; Murakami, M. T.; Dupree, P.; Souza, A. P., An  
422 engineered GH1  $\beta$ -glucosidase displays enhanced glucose tolerance and increased sugar  
423 release from lignocellulosic materials. *Sci Rep* **2019**, *9* (1), 4903.
- 424 7. Liu, X.; Cao, L.; Zeng, J.; Liu, Y.; Xie, W., Improving the cellobiose-hydrolysis  
425 activity and glucose-tolerance of a thermostable  $\beta$ -glucosidase through rational design. *Int J*  
426 *Biol Macromol* **2019**, *136*, 1052-1059.
- 427 8. Goswami, S.; Das, S.; Datta, S., Understanding the role of residues around the active  
428 site tunnel towards generating a glucose-tolerant  $\beta$ -glucosidase from Agrobacterium  
429 tumefaciens 5A. *Protein Eng Des Sel* **2017**, *30* (7), 523-530.
- 430 9. Lenz, F.; Zurek, P.; Umlauf, M.; Tozakidis, I. E. P.; Jose, J., Tailor-made  $\beta$ -  
431 glucosidase with increased activity at lower temperature without loss of stability and glucose  
432 tolerance. *Green chemistry* **2020**, *22* (7), 2234-2243.
- 433 10. Guo, B.; Amano, Y.; Nozaki, K., Improvements in Glucose Sensitivity and Stability  
434 of Trichoderma reesei  $\beta$ -Glucosidase Using Site-Directed Mutagenesis. *PLoS One* **2016**, *11*  
435 (1), e0147301.
- 436 11. Cao, L. C.; Wang, Z. J.; Ren, G. H.; Kong, W.; Li, L.; Xie, W.; Liu, Y. H.,  
437 Engineering a novel glucose-tolerant  $\beta$ -glucosidase as supplementation to enhance the  
438 hydrolysis of sugarcane bagasse at high glucose concentration. *Biotechnol Biofuels* **2015**, *8*,  
439 202.
- 440 12. Cao, L.; Chen, R.; Huang, X.; Li, S.; Zhang, S.; Yang, X.; Qin, Z.; Kong, W.; Xie,  
441 W.; Liu, Y., Engineering of  $\beta$ -Glucosidase Bgl15 with Simultaneously Enhanced Glucose  
442 Tolerance and Thermostability To Improve Its Performance in High-Solid Cellulose  
443 Hydrolysis. *J Agric Food Chem* **2020**, *68* (19), 5391-5401.

- 444 13. Goswami, S.; Gupta, N.; Datta, S., Using the  $\beta$ -glucosidase catalyzed reaction product  
445 glucose to improve the ionic liquid tolerance of  $\beta$ -glucosidases. *Biotechnol Biofuels* **2016**, *9*,  
446 72.
- 447 14. Trott, O.; Olson, A. J., AutoDock Vina: improving the speed and accuracy of docking  
448 with a new scoring function, efficient optimization, and multithreading. *J Comput Chem* **2010**,  
449 *31* (2), 455-61.
- 450 15. Wang, C.; Ye, F.; Chang, C.; Liu, X.; Wang, J.; Wang, J.; Yan, X. F.; Fu, Q.; Zhou,  
451 J.; Chen, S.; Gao, Y. G.; Zhang, L. H., Agrobacteria reprogram virulence gene expression by  
452 controlled release of host-conjugated signals. *Proc Natl Acad Sci U S A* **2019**, *116* (44), 22331-  
453 22340.
- 454 16. BIOVIA, D. S., BIOVIA Discovery Studio. San Diego, **2020**.
- 455 17. Schöning-Stierand, K.; Diedrich, K.; Fährrolfes, R.; Flachsenberg, F.; Meyder, A.;  
456 Nittinger, E.; Steinegger, R.; Rarey, M., ProteinsPlus: interactive analysis of protein–ligand  
457 binding interfaces. *Nucleic Acids Research* **2020**, *48* (W1), W48-W53.
- 458 18. Brøns-Poulsen, J.; Petersen, N. E.; Hørder, M.; Kristiansen, K., An improved PCR-  
459 based method for site directed mutagenesis using megaprimers. *Mol Cell Probes* **1998**, *12* (6),  
460 345-8.
- 461 19. Case, D.; Belfon, K.; Ben-Shalom, I.; Brozell, S.; Cerutti, D.; Cheatham, T.;  
462 Cruzeiro, V.; Darden, T.; Duke, R.; Giambasu, G., AMBER 2020: University of California.  
463 *San Francisco* **2020**.
- 464 20. Manna, B.; Ghosh, A., Molecular Insight into Glucose-Induced Conformational  
465 Change to Investigate Uncompetitive Inhibition of GH1  $\beta$ -Glucosidase. *ACS Sustainable*  
466 *Chemistry & Engineering* **2021**, *9* (4), 1613-1624.
- 467 21. Goswami, S.; Manna, B.; Chattopadhyay, K.; Ghosh, A.; Datta, S., Role of  
468 Conformational Change and Glucose Binding Sites in the Enhanced Glucose Tolerance of  
469 *Agrobacterium tumefaciens* 5A GH1  $\beta$ -Glucosidase Mutants. *J Phys Chem B* **2021**, *125* (33),  
470 9402-9416.
- 471 22. Maier, J. A.; Martinez, C.; Kasavajhala, K.; Wickstrom, L.; Hauser, K. E.;  
472 Simmerling, C., ff14SB: Improving the Accuracy of Protein Side Chain and Backbone  
473 Parameters from ff99SB. *J Chem Theory Comput* **2015**, *11* (8), 3696-713.
- 474 23. Kirschner, K. N.; Yongye, A. B.; Tschampel, S. M.; González-Outeiriño, J.; Daniels,  
475 C. R.; Foley, B. L.; Woods, R. J., GLYCAM06: a generalizable biomolecular force field.  
476 *Carbohydrates*. *J Comput Chem* **2008**, *29* (4), 622-55.
- 477 24. Pettersen, E. F.; Goddard, T. D.; Huang, C. C.; Couch, G. S.; Greenblatt, D. M.;  
478 Meng, E. C.; Ferrin, T. E., UCSF Chimera--a visualization system for exploratory research and  
479 analysis. *J Comput Chem* **2004**, *25* (13), 1605-12.
- 480 25. Martínez, L.; Andrade, R.; Birgin, E. G.; Martínez, J. M., PACKMOL: a package for  
481 building initial configurations for molecular dynamics simulations. *J Comput Chem* **2009**, *30*  
482 (13), 2157-64.

- 483 26. Dolinsky, T. J.; Nielsen, J. E.; McCammon, J. A.; Baker, N. A., PDB2PQR: an  
484 automated pipeline for the setup of Poisson-Boltzmann electrostatics calculations. *Nucleic*  
485 *Acids Res* **2004**, *32* (Web Server issue), W665-7.
- 486 27. Jorgensen, W. L.; Chandrasekhar, J.; Madura, J. D.; Impey, R. W.; Klein, M. L.,  
487 Comparison of simple potential functions for simulating liquid water. *The Journal of Chemical*  
488 *Physics* **1983**, *79* (2), 926-935.
- 489 28. Darden, T.; Perera, L.; Li, L.; Pedersen, L., New tricks for modelers from the  
490 crystallography toolkit: the particle mesh Ewald algorithm and its use in nucleic acid  
491 simulations. *Structure* **1999**, *7* (3), R55-60.
- 492 29. Roe, D. R.; Cheatham, T. E., 3rd, PTRAJ and CPPTRAJ: Software for Processing and  
493 Analysis of Molecular Dynamics Trajectory Data. *J Chem Theory Comput* **2013**, *9* (7), 3084-  
494 95.
- 495 30. Humphrey, W.; Dalke, A.; Schulten, K., VMD: visual molecular dynamics. *J Mol*  
496 *Graph* **1996**, *14* (1), 33-8, 27-8.
- 497 31. Manna, B.; Ghosh, A., Understanding the conformational change and inhibition of  
498 hyperthermophilic GH10 xylanase in ionic liquid. *Journal of Molecular Liquids* **2021**, *332*,  
499 115875.
- 500 32. Manna, B.; Ghosh, A., Structure and dynamics of ionic liquid tolerant  
501 hyperthermophilic endoglucanase Cel12A from *Rhodothermus marinus*. *RSC Adv* **2020**, *10*  
502 (13), 7933-7947.
- 503 33. Felling, A.; Seeber, M.; Fanelli, F., PSNtools for standalone and web-based structure  
504 network analyses of conformational ensembles. *Comput Struct Biotechnol J* **2022**, *20*, 640-649.
- 505 34. Guo, B.; Sato, N.; Biely, P.; Amano, Y.; Nozaki, K., Comparison of catalytic  
506 properties of multiple  $\beta$ -glucosidases of *Trichoderma reesei*. *Appl Microbiol Biotechnol* **2016**,  
507 *100* (11), 4959-68.
- 508 35. Xia, W.; Bai, Y.; Cui, Y.; Xu, X.; Qian, L.; Shi, P.; Zhang, W.; Luo, H.; Zhan, X.;  
509 Yao, B., Functional diversity of family 3  $\beta$ -glucosidases from thermophilic cellulolytic fungus  
510 *Humicola insolens* Y1. *Sci Rep* **2016**, *6*, 27062.
- 511 36. Riou, C.; Salmon, J. M.; Vallier, M. J.; Günata, Z.; Barre, P., Purification,  
512 characterization, and substrate specificity of a novel highly glucose-tolerant beta-glucosidase  
513 from *Aspergillus oryzae*. *Appl Environ Microbiol* **1998**, *64* (10), 3607-14.
- 514 37. Uchiyama, T.; Yaoi, K.; Miyazaki, K., Glucose-tolerant  $\beta$ -glucosidase retrieved from  
515 a Kusaya gravy metagenome. *Front Microbiol* **2015**, *6*, 548.

516

517

518

519 **Figure Legends**

520 **Figure 1. (a)** Relative activity profile of Q319A H0HC94 mutant between 37°C to 55° C in 50  
521 mM potassium phosphate buffer pH 7; **(b)** Relative activity profile of Q319A H0HC94 mutant  
522 through pH 4-10 in 50 mM potassium phosphate buffer at 49 °C; **(c)** Michaelis-Menten kinetic  
523 profile of Q319A H0HC94 mutant on *p*-nitrophenyl beta-D-glucopyranoside (*p*NPGlc) in the  
524 absence of glucose using 0.16 µg of enzyme in 50 mM potassium phosphate buffer, pH 7, at  
525 49 °C; **(d)** Michaelis-Menten kinetic profile of Q319A H0HC94 mutant on cellobiose, in the  
526 absence of glucose using 0.16 µg of enzyme in 50 mM potassium phosphate buffer, pH 7, at  
527 49 °C; **(e)** Comparison of  $K_m$  between WT and Q319A on *p*NPGlc; **(f)** Comparison of  $k_{cat}$   
528 between WT and Q319A on *p*NPGlc; **(g)** Comparison of  $k_{cat}/K_M$  between WT and Q319A on  
529 *p*NPGlc; **(h)** Comparison of specific activity of WT and Q319A on *p*NPGlc and cellobiose.

530

531 **Figure 2. (a)** Half-life of Q319A H0HC94. The enzyme in 50 mM potassium buffer, pH 7, was  
532 incubated at 49 °C, and aliquots were removed at 10 minute intervals for specific activity  
533 measurement. **(b)** Circular Dichroism spectra of WT H0HC94 and Q319A (1.9 µM) in 50 mM  
534 potassium phosphate buffer, pH 7 at room temperature (25 °C) **(c)** Comparison of melting  
535 temperature of WT and Q319A determined by differential scanning fluorimetry (DSF) and CD  
536 **(d)** Comparison of the half-life of WT and Q319A at their optimum temperatures.

537

538 **Figure 3.** The structural changes of H0HC94 during MD simulations showing **(a)** Root-mean-  
539 square deviation (rmsd) of H0HC94 in S1 (WT+*p*NPGlc), S2 (WT+Cellobiose), S3  
540 (Q319A+*p*NPGlc) and S4 (Q319A+Cellobiose) systems. **(b)** Root-mean-square fluctuations  
541 (rmsf) of the H0HC94 in S1 (WT+*p*NPGlc), S2 (WT+Cellobiose), S3 (Q319A+*p*NPGlc) and  
542 S4 (Q319A+Cellobiose) systems. The catalytic residues, acid/base residue E171, and

543 nucleophilic residue E359 are marked in magenta circles. A cyan circle marks the mutated  
544 residue Q319A.

545

546 **Figure 4. (a)** The number of hydrogen bonds between H0HC94 and (i) pNPGlc and (ii)  
547 Cellobiose in S1 (WT+pNPGlc), S2 (WT+Cellobiose), S3 (Q319A+pNPGlc), and S4  
548 (Q319A+Cellobiose) systems during the simulation; **(b)** The hydrogen bond fractions between  
549 H0HC94 and substrates (pNPGlc/ Cellobiose) in **(i)** S1 (WT+pNPGlc), **(ii)** S3  
550 (Q319A+pNPGlc), **(iii)** S2 (WT+Cellobiose), and **(iv)** S4 (Q319A+Cellobiose) systems.

551

552 **Figure 5.** Variation of dynamically stable community structures of H0HC94 using protein  
553 structure network analysis. The network representation of the communities are shown in **(a)**,  
554 whereas **(b)** depicts the position of communities in the protein structure in S1 (WT+pNPGlc).  
555 The network representation of the communities in S3 (Q319A+pNPGlc) is presented in **(c)**,  
556 whereas **(d)** shows the position of the communities in the protein structure.

557

558 **Figure 6.** Variation of dynamically stable community structures of H0HC94 using protein  
559 structure network analysis. The network representation of the communities is shown in **(a)**,  
560 whereas **(b)** shows the position of the communities in the protein structure in S2  
561 (WT+cellobiose). The network representation of the communities in S4 (Q319A+cellobiose)  
562 is presented in **(c)**, whereas **(d)** shows the position of the communities in the protein structure.

563

564

565

566

567 **Figure 1**

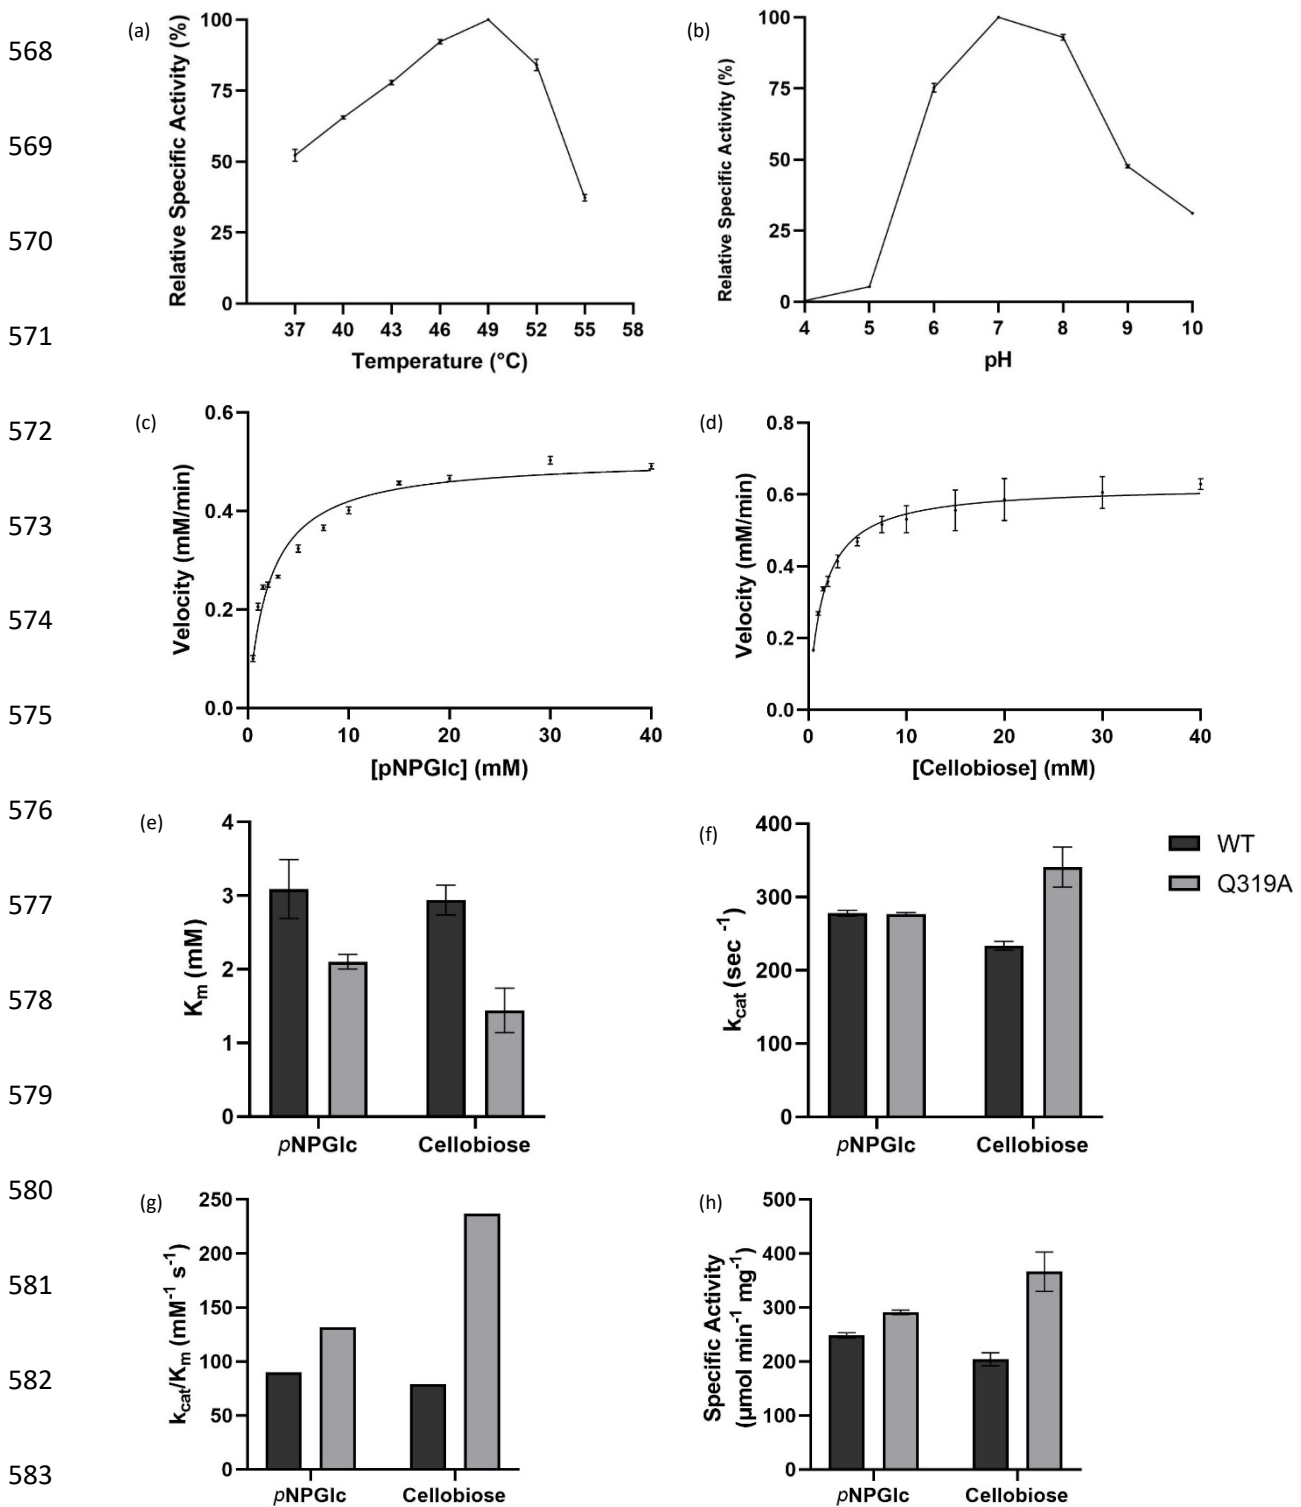

584

585

586

587 **Figure 2**

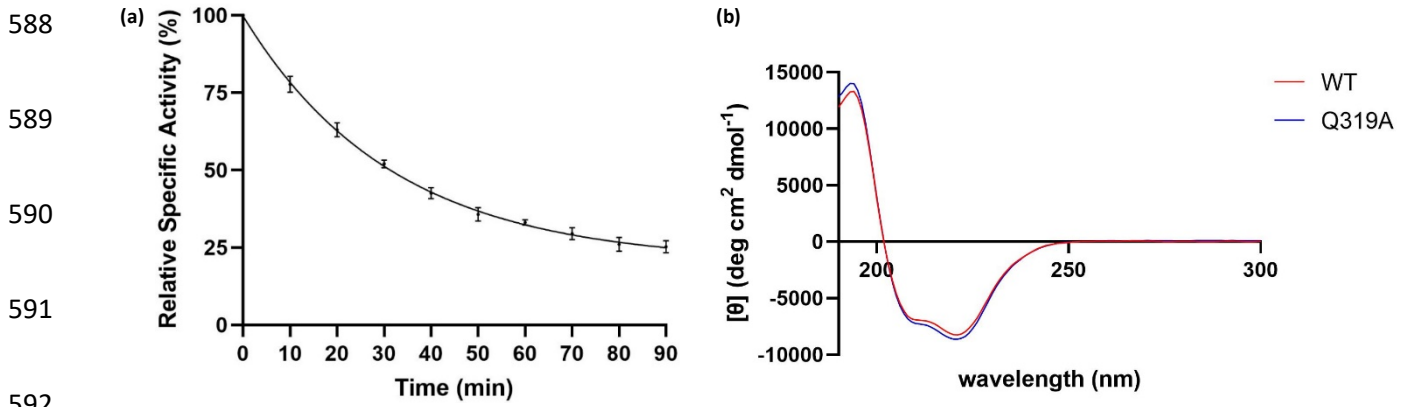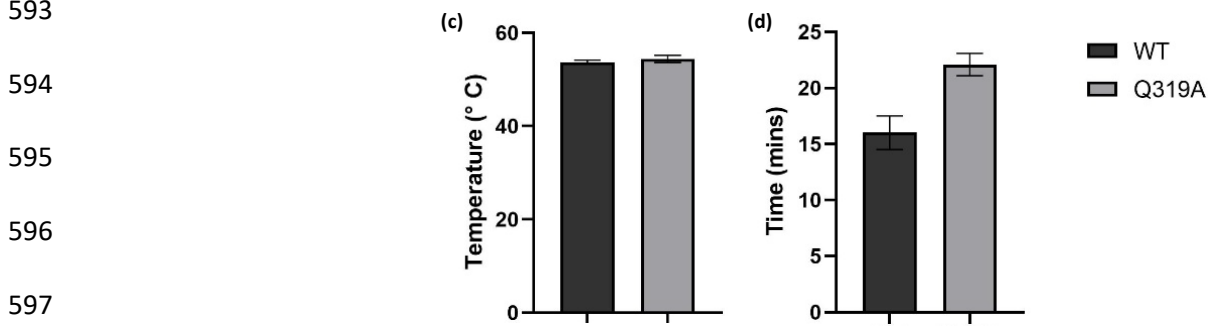

593  
594  
595  
596  
597  
598  
599  
600  
601  
602  
603  
604  
605  
606  
607  
608

609 **Figure 3**

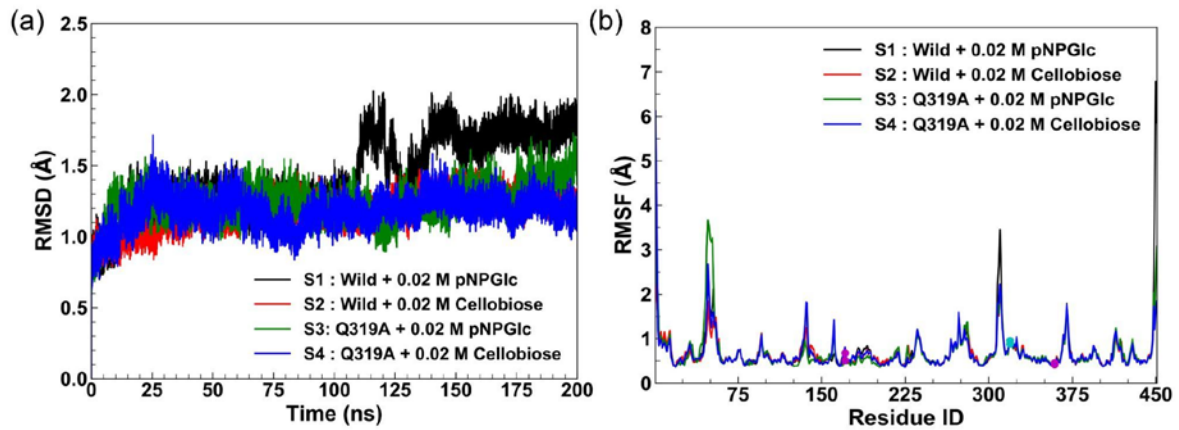

610

611

612

613

614

615

616

617

618

619

620

621

622

623



624 **Figure 4**

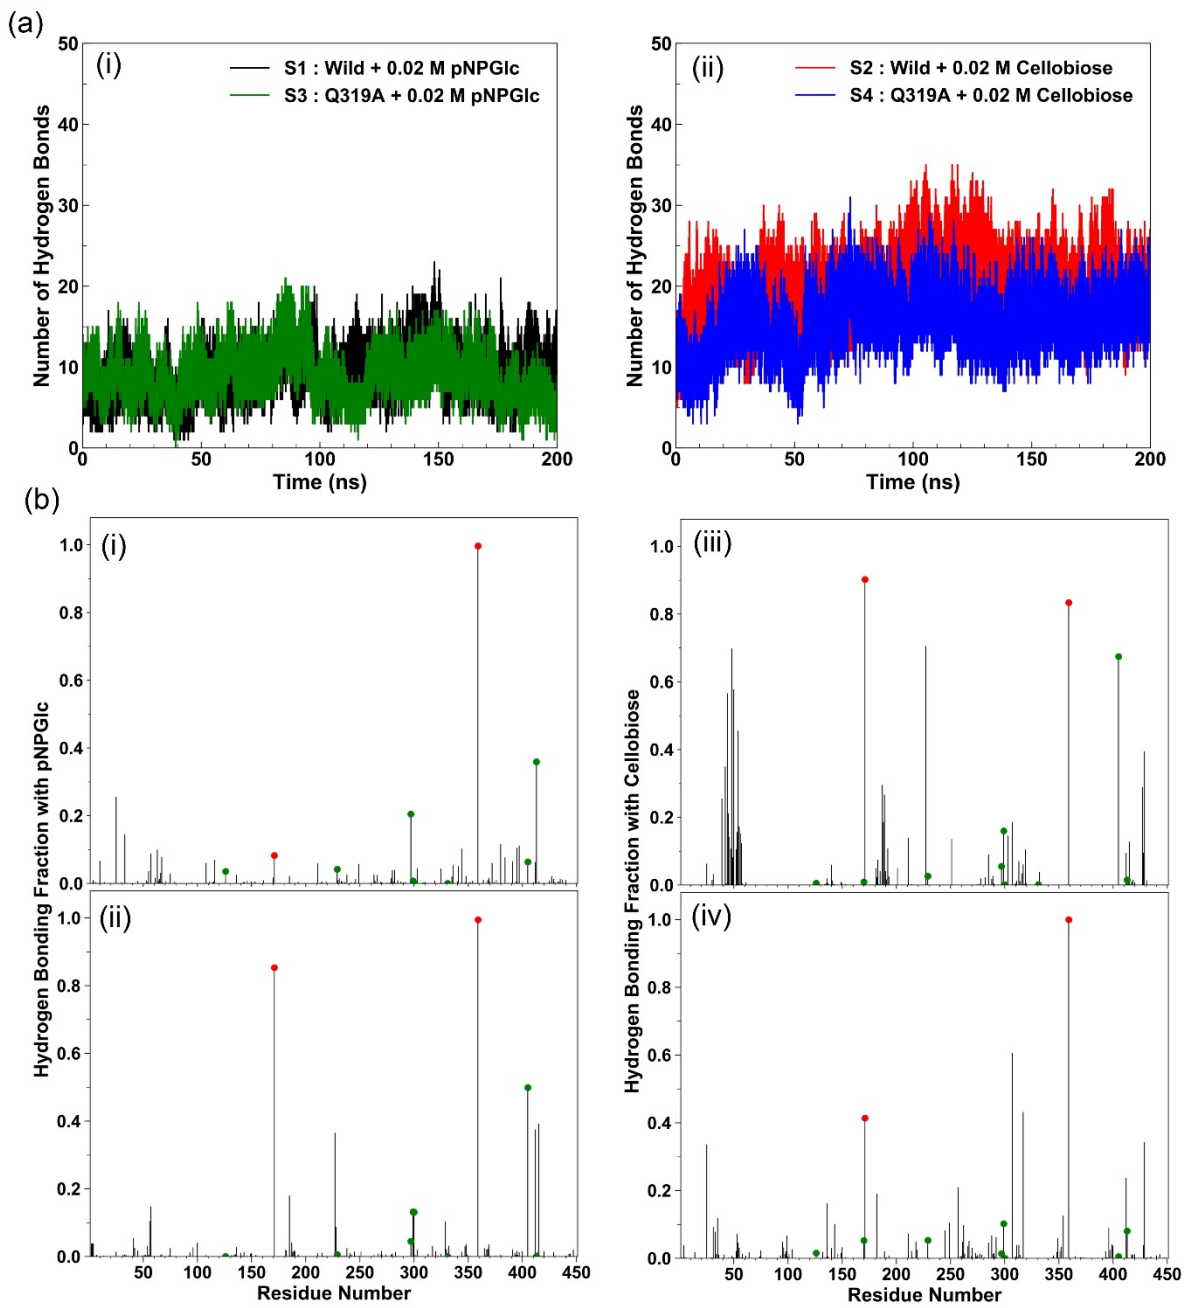

625

626

627

628

629

630

631

632 **Figure 5**

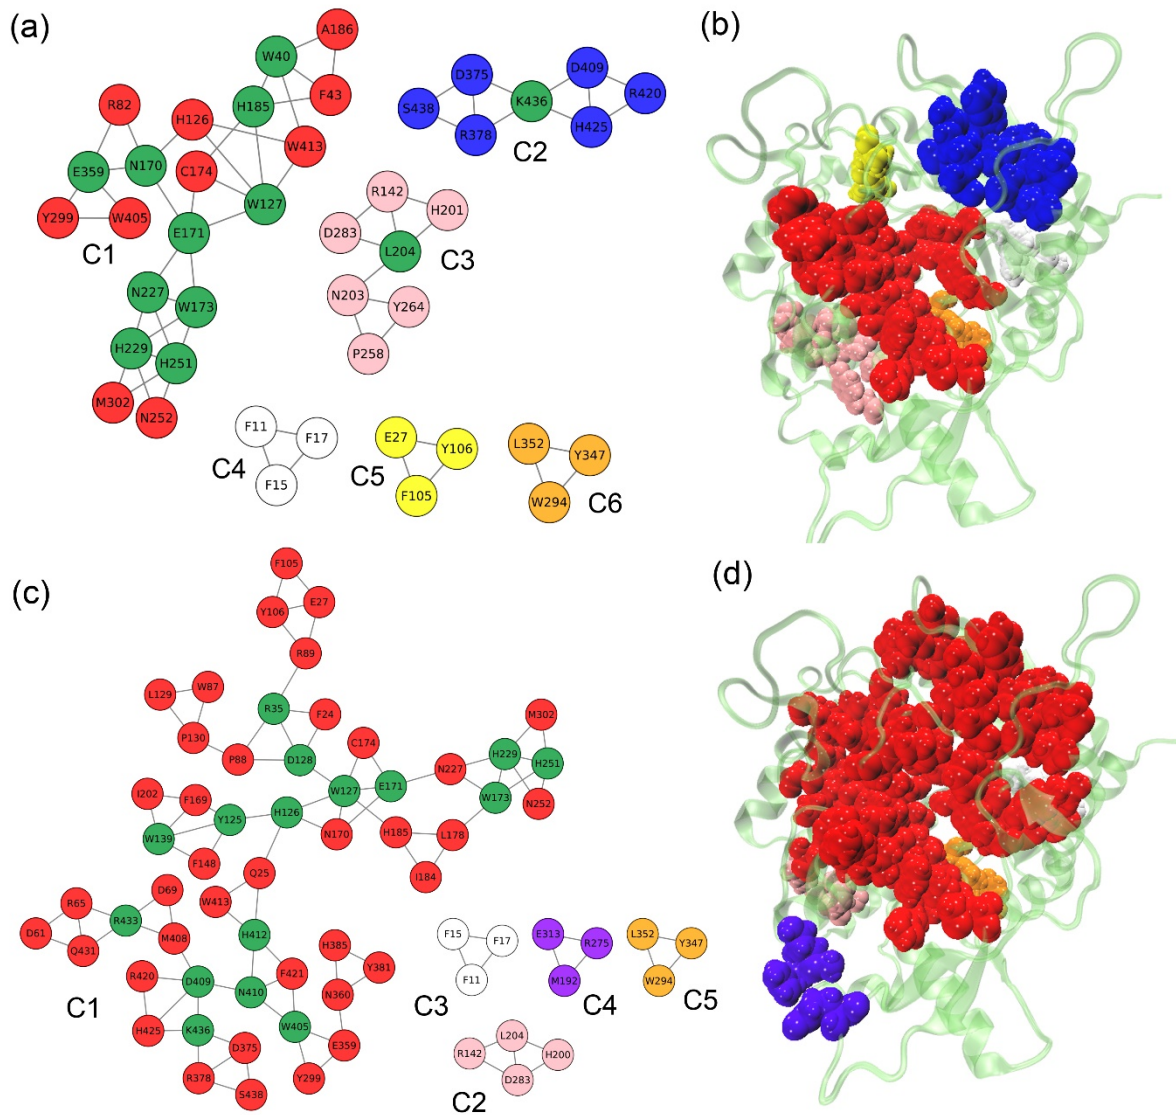

633

634

635

636

637

638

639

640

641

642

643

644 **Figure 6**

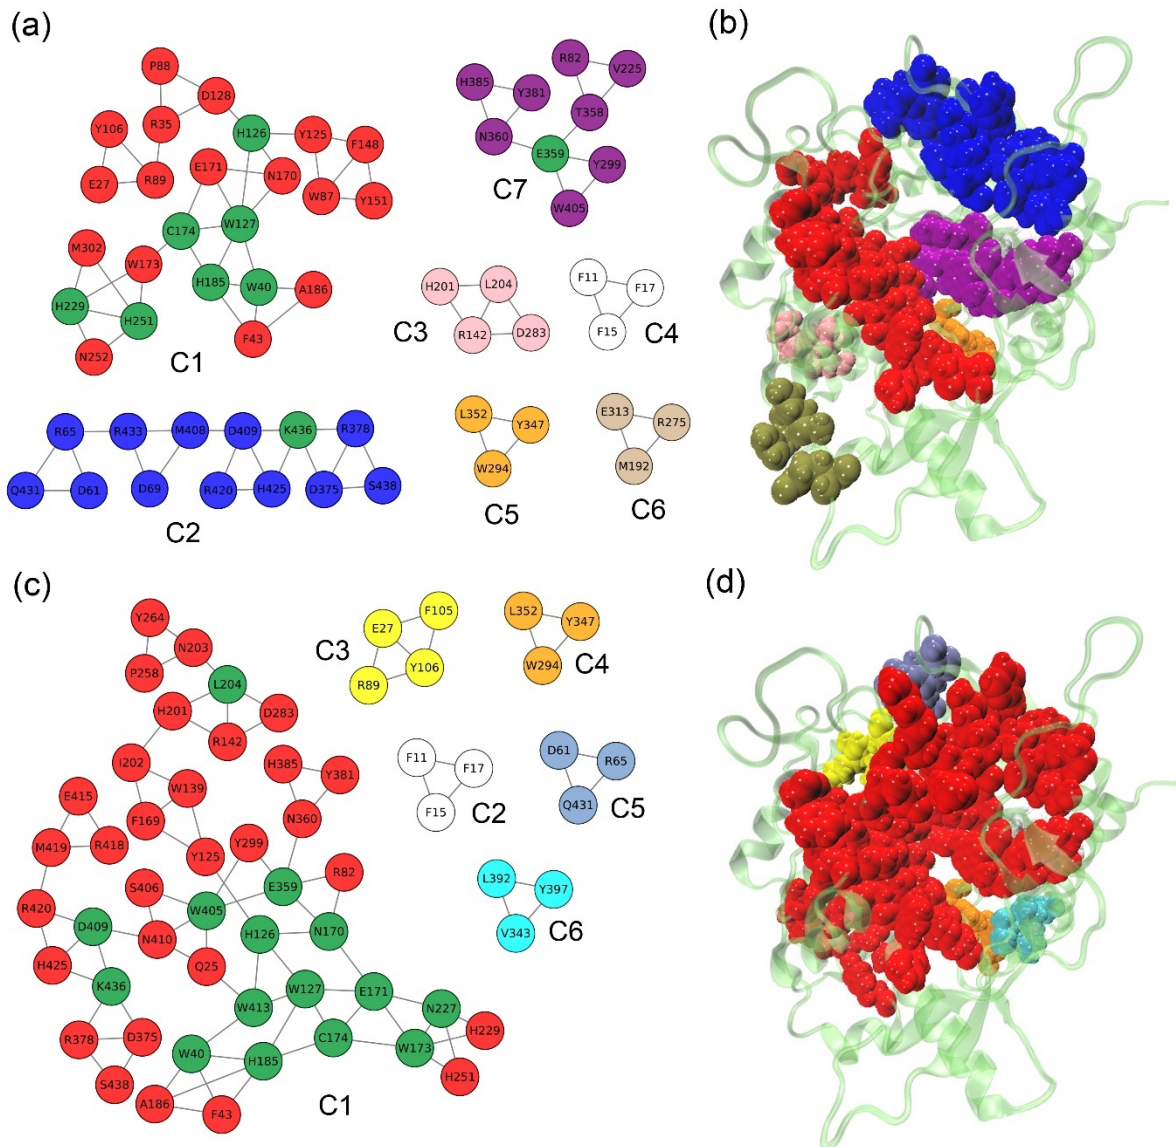

645

646

647

648

649

650

651

652

653

654

655

656 **Table 1.** A comparison of Q319A optimum temperature, specific activity,  $K_m$ ,  $k_{cat}$ , and  
 657  $k_{cat}/K_m$  on cellobiose with WT and engineered and naturally available GH1  $\beta$ -glucosidases  
 658 previously reported in the literature.

| Enzyme                                                | Optimum temperature (°C) | Specific activity ( $\mu\text{mol min}^{-1} \text{mg}^{-1}$ ) | $K_m$ (mM)          | $k_{cat}$ ( $\text{s}^{-1}$ ) | $k_{cat}/K_m$ ( $\text{mM}^{-1} \text{s}^{-1}$ ) | Reference  |
|-------------------------------------------------------|--------------------------|---------------------------------------------------------------|---------------------|-------------------------------|--------------------------------------------------|------------|
| <b>H0HC94</b>                                         | 52                       | 204 $\pm$ 12                                                  | 2.94                | 233.4 $\pm$ 6                 | 79.32                                            | 8          |
| <b>Q319A H0HC94</b>                                   | 49                       | 366.3 $\pm$ 36.6                                              | 1.44 $\pm$ 0.3      | 340.8 $\pm$ 27.4              | 236.65                                           | This study |
| <b>CsBglA</b>                                         | 80                       | 359 $\pm$ 10                                                  | 61.15 $\pm$ 10.53   | 328 $\pm$ 26.2                | 5.4 $\pm$ 1.4                                    | 9          |
| <b>CsBglA-LYTH</b>                                    | 65                       | 552 $\pm$ 40                                                  | 37.06 $\pm$ 6.87    | 504 $\pm$ 36.7                | 13.6 $\pm$ 3.5                                   | 9          |
| <b>Bgl 1317</b>                                       | 60                       | 2.16 $\pm$ 0.07                                               | ND                  | ND                            | ND                                               | 7          |
| <b>A397R Bgl 1317</b>                                 | ND                       | 3.7*                                                          | ND                  | ND                            | ND                                               | 7          |
| <b>Bgl6</b>                                           | 50-55                    | 21.71 $\pm$ 0.27                                              | 38.45 $\pm$ 1.51    | 21.50 $\pm$ 0.38              | 0.56                                             | 11         |
| <b>Bgl6 M3</b>                                        | 60                       | ND                                                            | 49.19 $\pm$ 1.75    | 83.11 $\pm$ 4.12              | 1.69                                             | 11         |
| <b>Bgl15</b>                                          | 50                       | ND                                                            | 2901.81 $\pm$ 72.50 | 292.82 $\pm$ 16.11            | 0.10 $\pm$ 0.01                                  | 12         |
| <b>Bgl15 5R1</b>                                      | 60                       | ND                                                            | 57.26 $\pm$ 4.32    | 68.51 $\pm$ 2.75              | 1.20 $\pm$ 0.09                                  | 12         |
| <b>Cel3B</b>                                          | 60                       | 33 $\pm$ 3.6                                                  | 0.31                | 6.7 $\pm$ 0.83                | 21.6                                             | 34         |
| <b>HiBgl3C</b>                                        | 60                       | 56                                                            | 6.63                | 152.5*                        | 23                                               | 35         |
| <b>HGT-BT</b>                                         | 50                       | 353                                                           | 7                   | 253*                          | 36                                               | 36         |
| <b>Recombinant Ks5A7 from Kusaya gravy metagenome</b> | 50                       | 170 $\pm$ 20                                                  | 0.358 $\pm$ 0.055   | 138                           | 386                                              | 37         |

659 \*Calculated using the parameters reported in the papers

660

661

662

663

664 TOC

665

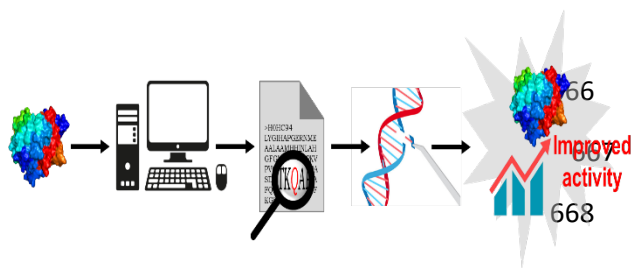

669

670 A rationally engineered  $\beta$ -glucosidase with a 1.5-fold increase in  $k_{cat}$ , and a 3-fold increase in

671 cellobiose specificity over the wild-type

672
